# Supplementary material for: Risk factors for chest wall depression after implant insertion for breast reconstruction: a retrospective quantitative study
Source: PubMed Central journal article supplement — Gland Surg. 2022 Aug;11(8):1333–40. doi: 10.21037/gs-22-101 (PMC9445711; doi:10.21037/gs-22-101), 2022-08
Supplement: gs-11-08-1333-dss.pdf [file gs-11-08-1333-dss.pdf]

## Data Sharing Statement

|                     |                                                                                                                                                     |                                                                                                                                         |
|---------------------|-----------------------------------------------------------------------------------------------------------------------------------------------------|-----------------------------------------------------------------------------------------------------------------------------------------|
| <b>Article Info</b> | https://dx.doi.org/10.21037/gs-22-101                                                                                                               |                                                                                                                                         |
| <b>Item</b>         | <b>Question</b>                                                                                                                                     | <b>Authors' Response<br/>(place "-" if not applicable)</b>                                                                              |
| 1                   | Would you like to share data collected for your study to others?                                                                                    | Yes. Data has been anonymized and is kept with the authors. Datasets are available from the corresponding author on reasonable request. |
| 2                   | If not, would you like to share the reason for your decision?                                                                                       | -                                                                                                                                       |
| 3                   | What data in particular will be shared?                                                                                                             | Antero-posterior length of pre- and postoperative chest wall, patient demographics, statistical analysis results                        |
| 4                   | Any other documents will be shared? Such as study protocol, statistical analysis plan, informed consent form, clinical study report, analytic code. | Statistical analysis plan, informed consent form, and clinical study report will also be shared if requested                            |
| 5                   | When will data availability begin?                                                                                                                  | From the publication date                                                                                                               |
| 6                   | When will data availability end?                                                                                                                    | -                                                                                                                                       |
| 7                   | To whom will you share the data?                                                                                                                    | Breast surgeons and plastic surgeons who are interested in reconstruction with implant insertion                                        |
| 8                   | For what type of analysis or purpose?                                                                                                               | For analysis to evaluate the possibility and risk factors of chest wall depression following implant insertion                          |
| 9                   | How or where can the data/documents be obtained?                                                                                                    | Emails could be sent to the address below to obtain the shared data: kjh6321@naver.com                                                  |
| 10                  | Any other restrictions?                                                                                                                             | We may balance the potential benefits and risks for each request and then provide the data that could be shared.                        |
